# Supplementary material for: IFC-CityGML Data Integration for 3D Property Valuation
Source: MDPI journal article supplement (doi:10.3390/ijgi12090351), 2023-08-25
Supplement: s1 [file s1]

Table S1: Variables specifications

| Interactive variables          | Input Data requirements (IFC)        | Output destination data requirements ( CityGML3.0)                                           |
|--------------------------------|--------------------------------------|----------------------------------------------------------------------------------------------|
| Entities                       | Indoor Daylight → IfcZone/ IfcSpace  | <ul style="list-style-type: none"> <li>- Bldg::Room</li> <li>- Bldg::BuildingUnit</li> </ul> |
|                                | Sound level → IfcSpace               |                                                                                              |
|                                | Air flow level → IfcSpace            |                                                                                              |
|                                | Temperature Level → IfcZone/IfcSpace |                                                                                              |
|                                | Energy Efficiency → IfcZone,         |                                                                                              |
| Attributes/<br>Pset_properties | IfcSpace/IfcZone :<br>+Rate          | <ul style="list-style-type: none"> <li>- Bldg::Room</li> <li>- Bldg::BuildingUnit</li> </ul> |
| Relationships                  | ---                                  | Room is child/parent hierarchy with Building unit                                            |

Table S2: Variables specifications

| Indoor variables           | Input Data requirements (IFC)                                                                                                                | Output destination data requirements ( CityGML3.0)                                                     |
|----------------------------|----------------------------------------------------------------------------------------------------------------------------------------------|--------------------------------------------------------------------------------------------------------|
| Entities                   | IfcBuilding,<br>IfcbuildingStorey :<br><br>PU Position<br>PU Size<br>PU Floor                                                                | To BuildingFloor and Building class                                                                    |
|                            | PU Cost → Ifc building elements, a semantic attribute to Property Unit mapping                                                               | - Bldg::BuildingUnit                                                                                   |
|                            | PU Quality                                                                                                                                   | - Bldg::BuildingUnit                                                                                   |
| Attributes/Pset_properties | <i>IfcBuilding:</i><br>+Address of Building<br><i>IfcBuildingStorey:</i><br>+PU Height<br>+Floor Number<br><i>Ifcwall,ifcslab,ifccolumn:</i> | BuildingConstructiveElement :<br>+PU Cost estimation<br>+PU Materials Type<br>+PU Materials Quantities |

|                                        |                                                                                                              |                                                                                                                                               |
|----------------------------------------|--------------------------------------------------------------------------------------------------------------|-----------------------------------------------------------------------------------------------------------------------------------------------|
|                                        | +Item Cost<br>+Pset_Materials Quantities<br>+Pset_ cost<br><i>IfcInstallations :</i><br>+ Installations Type |                                                                                                                                               |
| Relationships                          | ----                                                                                                         | From BuildingConstructiveElement to Building unit : a part of                                                                                 |
| <b>“PropertyUnit” Specifications :</b> | <b>Input Data requirements (IFC)</b>                                                                         | <b>Output destination data requirements ( CityGML3.0)</b>                                                                                     |
| Generic Entities                       | <i>IfcSite</i>                                                                                               | <i>CityModel</i>                                                                                                                              |
|                                        | <i>IfcBuilding</i>                                                                                           | <i>Building</i>                                                                                                                               |
|                                        | <i>IfcbuildingStorey</i>                                                                                     | <i>BuildingFloor</i><br><i>Building Unit</i>                                                                                                  |
|                                        | <i>Ifc building parts:( IfcWall, IfcSlab, IfcColumn, IfcMember)</i>                                          | <i>Building Constructive Element</i>                                                                                                          |
|                                        | <i>Ifc installations</i>                                                                                     | <i>Building</i>                                                                                                                               |
|                                        | <i>Ifc opening ( door, window)</i>                                                                           | <i>Building</i>                                                                                                                               |
|                                        | <i>IfcSpace</i>                                                                                              | <i>Bldg:: Room</i>                                                                                                                            |
| Generic Attributes                     | <i>IfcbuildingStorey :</i><br>+ CompositionType : Partial                                                    | <i>Building Constructive Element</i><br>+BuildingElementType                                                                                  |
|                                        | <i>IfcSpace:</i><br>+Area; +Volume,<br>+PropertyUnitName;<br>+PropertyUnitNumber                             | <i>Bldg:: Room</i>                                                                                                                            |
| Relationships                          | <i>Ifc building parts:</i> Merge<br><i>IfcbuildingStorey:</i> Spatial Structure                              | From <i>Building Constructive Element</i> To <i>Building Unit</i> : A part of<br>From <i>Blding: Room</i> to <i>Building Unit</i> : A part of |

Table S3: Variables specifications

| Outdoor variables | Input Data requirements (IFC)                                                                                                                                     | Output destination data requirements (CityGML3.0)                                                                                                                                                                                          |
|-------------------|-------------------------------------------------------------------------------------------------------------------------------------------------------------------|--------------------------------------------------------------------------------------------------------------------------------------------------------------------------------------------------------------------------------------------|
| Entities          | Sunlight Exposure → ---                                                                                                                                           | <ul style="list-style-type: none"> <li>- CityGML_Core::_CityObjects</li> <li>- CityGML_Core::_CityObjectsGroup</li> <li>- Bldg::Room</li> <li>- Bldg::BuildingUnit</li> <li>- LandUse::_LandUse</li> </ul>                                 |
|                   | Noise Level → ---                                                                                                                                                 | <ul style="list-style-type: none"> <li>- CityGML_Core::_CityObjects</li> <li>- CityGML_Core::_CityObjectsGroup</li> <li>- Bldg::Room</li> <li>- Bldg::BuildingUnit</li> <li>- LandUse::_LandUse</li> <li>- Transportation::Road</li> </ul> |
|                   | Air Quality → ---                                                                                                                                                 | <ul style="list-style-type: none"> <li>- CityGML_Core::_CityObjects</li> <li>- CityGML_Core::_CityObjectsGroup</li> <li>- Bldg::Room</li> <li>- Bldg::BuildingUnit</li> <li>- LandUse::_LandUse</li> <li>- Transportation::Road</li> </ul> |
|                   | View quality → ---                                                                                                                                                | <ul style="list-style-type: none"> <li>- CityGML_Core::_CityObjects</li> <li>- CityGML_Core::_CityObjectsGroup</li> <li>- Bldg::Room</li> <li>- Bldg::BuildingUnit</li> <li>- Bldg::_Opening</li> <li>- LandUse::_LandUse</li> </ul>       |
| Attributes        | <p><i>IfcOpening :</i></p> <p>+Opening dimensions</p> <p>+Opening thermal properties</p> <p><i>Ifcwall:</i></p> <p>+Materials Type</p> <p>+Thermal properties</p> | <p>Bldg::BuildingUnit:</p> <p>+Sunlight Value</p> <p>+Sunlight Quality</p> <p>+Noise Value</p> <p>+Noise Quality</p> <p>+Air quality</p> <p>+View Type</p> <p>+View Rate</p> <p>+View Quality</p>                                          |
